# Supplementary material for: Prognostic implications of mismatch repair deficiency in patients with nonmetastatic colorectal and endometrial cancer
Source: PubMed Central journal article supplement — ESMO Open. 2019 Mar 12;4(2):e000474. doi: 10.1136/esmoopen-2018-000474 (PMC6555870; doi:10.1136/esmoopen-2018-000474), 2019-03-12
Supplement: esmoopen-2018-000474supp001.pdf [file esmoopen-2018-000474supp001.pdf]

**Table S1.** Prognostic significance of clinical parameters in patients with colorectal and endome

| Parameter                    | Categories                         | N patients  |
|------------------------------|------------------------------------|-------------|
| <b>Colorectal cancer</b>     |                                    |             |
| Age                          |                                    |             |
| Gender                       | Male vs. Female                    | 544 vs. 447 |
| Tumor location               |                                    |             |
|                              | Right vs. left                     | 308 vs. 392 |
|                              | Rectum vs. left                    | 278 vs. 392 |
| Primary tumor (T)            |                                    |             |
|                              | T2 vs. T1                          | 79 vs. 4    |
|                              | T3 vs. T1                          | 806 vs. 4   |
|                              | T4 vs. T1                          | 68 vs. 4    |
| Regional lymph nodes (N)     |                                    |             |
|                              | N2 vs. N0                          | 186 vs. 408 |
|                              | N2 vs. N1                          | 186 vs. 370 |
| Stage                        |                                    |             |
|                              | II vs. I                           | 405 vs. 8   |
|                              | III vs. I                          | 571 vs. 8   |
| Grade                        |                                    |             |
|                              | 2 vs. 1                            | 725 vs. 77  |
|                              | 3 vs. 1                            | 163 vs. 77  |
| Blood vessel invasion        | Yes vs. No                         | 128 vs. 721 |
| Lymphatic vessel invasion    | Yes vs. No                         | 205 vs. 637 |
| Mucinous component           | Yes vs. No                         | 360 vs. 453 |
| Perineural invasion          | Yes vs. No                         | 121 vs. 716 |
| Radiation therapy            | Yes vs. No                         | 247 vs. 657 |
| <b>Endometrial cancer</b>    |                                    |             |
| Age                          |                                    |             |
| Grade                        |                                    |             |
|                              | 2 vs. 1                            | 75 vs. 48   |
|                              | 3 vs. 1                            | 42 vs. 48   |
| Histology type (endometrium) |                                    |             |
|                              | mixed vs. endometrioid             | 6 vs. 144   |
|                              | other vs. endometrioid             | 2 vs. 144   |
|                              | serous/clear cell vs. endometrioid | 15 vs. 144  |
| Primary tumor (T)            |                                    |             |
|                              | T3 vs. T1                          | 20 vs. 129  |
|                              | T3 vs. T2                          | 20 vs. 12   |
| Regional lymph nodes (N)     |                                    |             |
|                              | N1 vs. N0                          | 12 vs. 125  |
|                              | N2 vs. N0                          | 4 vs. 125   |
| Stage                        |                                    |             |
|                              | III vs. I                          | 31 vs. 120  |
|                              | III vs. II                         | 31 vs. 10   |
| Radiation therapy            | Yes vs. No                         | 103 vs. 64  |

Abbreviations: N: number, OS: overall survival, vs: versus

breast cancer (10-year OS)

| N events    | HR    | 95% CI     | Wald's p         |
|-------------|-------|------------|------------------|
|             | 1.03  | 1.02-1.04  | <b>&lt;0.001</b> |
| 161 vs. 115 | 1.12  | 0.88-1.43  | 0.34             |
|             |       |            | 0.5              |
| 83 vs. 107  | 1.07  | 0.80-1.42  | 0.65             |
| 84 vs. 107  | 1.19  | 0.89-1.58  | 0.24             |
|             |       |            | <b>0.035</b>     |
| 14 vs. 1    | 0.7   | 0.09-5.30  | 0.73             |
| 224 vs. 1   | 1.18  | 0.17-8.43  | 0.87             |
| 26 vs. 1    | 1.81  | 0.25-13.35 | 0.56             |
| 88 vs. 71   | 3.57  | 2.61-4.88  | <b>&lt;0.001</b> |
| 88 vs. 105  | 3.57  | 2.61-4.88  | <b>&lt;0.001</b> |
|             |       |            | <b>&lt;0.001</b> |
| 74 vs. 1    | 1.42  | 0.20-10.21 | 0.73             |
| 199 vs. 1   | 3.19  | 0.45-22.73 | 0.25             |
|             |       |            | 0.26             |
| 193 vs. 21  | 1     | 0.64-1.58  | 0.98             |
| 52 vs. 21   | 1.29  | 0.78-2.15  | 0.32             |
| 47 vs. 186  | 1.5   | 1.09-2.07  | <b>0.012</b>     |
| 65 vs. 164  | 1.25  | 0.94-1.66  | 0.13             |
| 116 vs. 113 | 1.35  | 1.04-1.75  | <b>0.023</b>     |
| 39 vs. 189  | 1.29  | 0.91-1.81  | 0.15             |
| 78 vs. 178  | 1.19  | 0.91-1.55  | 0.2              |
|             | 1.04  | 1.00-1.07  | <b>0.037</b>     |
| 15 vs. 3    | 3.25  | 0.94-11.27 | 0.063            |
| 23 vs. 3    | 13.5  | 4.04-45.19 | <b>&lt;0.001</b> |
|             |       |            | <b>0.003</b>     |
| 1 vs. 32    | 0.86  | 0.12-6.28  | 0.88             |
| 2 vs. 32    | 12.49 | 2.92-53.44 | <b>0.001</b>     |
| 6 vs. 32    | 2.27  | 0.95-5.46  | 0.066            |
| 13 vs. 17   | 8.14  | 3.93-16.90 | <b>&lt;0.001</b> |
| 13 vs. 9    | 8.14  | 3.93-16.90 | <b>&lt;0.001</b> |
|             |       |            | <b>0.004</b>     |
| 3 vs. 24    | 1.98  | 0.59-6.66  | 0.27             |
| 0 vs. 24    | 7.68  | 2.23-26.41 | <b>0.001</b>     |
| 0 vs. 16    | 6.42  | 3.18-12.96 | <b>&lt;0.001</b> |
| 0 vs. 7     | 6.42  | 3.18-12.96 | <b>&lt;0.001</b> |
| 29 vs. 12   | 1.44  | 0.73-2.82  | 0.29             |
