# Supplementary material for: Prognostic implications of mismatch repair deficiency in patients with nonmetastatic colorectal and endometrial cancer
Source: PubMed Central journal article supplement — ESMO Open. 2019 Mar 12;4(2):e000474. doi: 10.1136/esmoopen-2018-000474 (PMC6555870; doi:10.1136/esmoopen-2018-000474), 2019-03-12
Supplement: esmoopen-2018-000474supp002.pdf [file esmoopen-2018-000474supp002.pdf]

**Table S2.** Univariate COX analysis per tumor type

| <b>Parameter</b>          | <b>Categories</b>          | <b>N patients</b> |
|---------------------------|----------------------------|-------------------|
| <b>Colorectal cancer</b>  |                            |                   |
| MMR status                | Negative vs. Positive      | 114 vs. 877       |
| MLH1                      | Negative vs. Positive      | 63 vs. 909        |
| PMS2                      | Deficiency vs. Proficiency | 69 vs. 910        |
| MSH2                      | Negative vs. Positive      | 30 vs. 957        |
| MSH6                      | Negative vs. Positive      | 23 vs. 959        |
| MLH1/PMS2 both negative   | Deficient vs. Proficient   | 49 vs. 916        |
| MSH2/MSH6 both negative   | Deficient vs. Proficient   | 13 vs. 971        |
| <b>Endometrial cancer</b> |                            |                   |
| MMR status                | Negative vs. Positive      | 80 vs. 87         |
| MLH1                      | Negative vs. Positive      | 20 vs. 132        |
| PMS2                      | Deficiency vs. Proficiency | 18 vs. 118        |
| MSH2                      | Negative vs. Positive      | 58 vs. 109        |
| MSH6                      | Negative vs. Positive      | 4 vs. 155         |
| MLH1/PMS2 both negative   | Deficient vs. Proficient   | 10 vs. 138        |
| MSH2/MSH6 both negative   | Deficient vs. Proficient   | 2 vs. 157         |

\* Firth's correction was used due to 0 events.

^ Stratified by protocol

## COX

| N events   | HR <sup>^</sup> | 95% CI      | Wald's p     |
|------------|-----------------|-------------|--------------|
| 27 vs. 252 | 0.73            | 0.49-1.09   | 0.13         |
| 14 vs. 262 | 0.68            | 0.40-1.17   | 0.17         |
| 16 vs. 261 | 0.74            | 0.45-1.23   | 0.24         |
| 6 vs. 271  | 0.59            | 0.26-1.32   | 0.2          |
| 6 vs. 270  | 0.79            | 0.35-1.78   | 0.58         |
| 10 vs. 264 | 0.62            | 0.33-1.17   | 0.14         |
| 2 vs. 274  | 0.43            | 0.11-1.74   | 0.24         |
| 12 vs. 30  | 0.38            | 0.20-0.76   | <b>0.006</b> |
| 6 vs. 33   | 1.21            | 0.50-2.91   | 0.67         |
| 5 vs. 35   | 1.07            | 0.42-2.74   | 0.89         |
| 6 vs. 36   | 0.26            | 0.11-0.61   | <b>0.002</b> |
| 1 vs. 41   | 0.81            | 0.11-5.89   | 0.83         |
| 4 vs. 35   | 1.91            | 0.68-5.39   | 0.22         |
| 0 vs. 42   | 0.68*           | 0.04-11.54* | 0.79*        |
