# Supplementary figures and images for: Prognostic implications of mismatch repair deficiency in patients with nonmetastatic colorectal and endometrial cancer
Source: PubMed Central journal article supplement — ESMO Open. 2019 Mar 12;4(2):e000474. doi: 10.1136/esmoopen-2018-000474 (PMC6555870; doi:10.1136/esmoopen-2018-000474), 2019-03-12

# Colorectal cohort

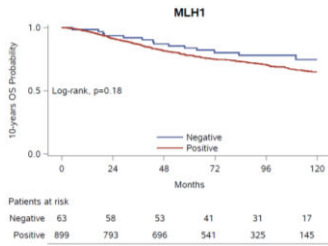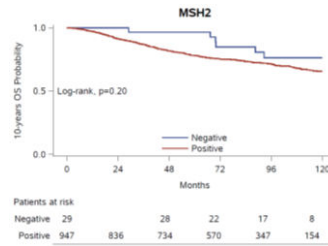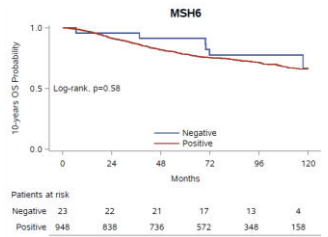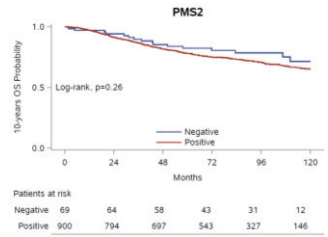

# Endometrial cohort

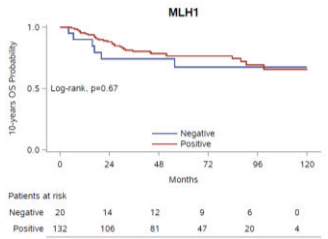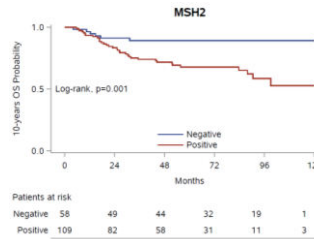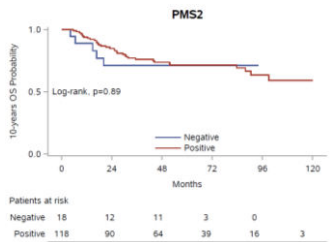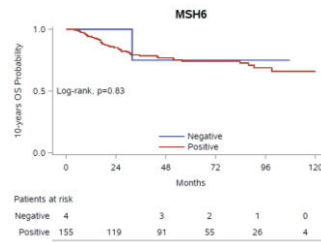

Supplement: esmoopen-2018-000474supp003.pdf [file esmoopen-2018-000474supp003.pdf]
